# Supplementary material
Source: PubMed Central journal article supplement (PMC7875139)
Supplement: NIHMS1604794-supplement-2.pdf [file NIHMS1604794-supplement-2.pdf]

## Supplementary Tables

**Supplementary Table 1. REDD1 inhibitors identified by computational screen and selected for study**

| Compound   | Structure                                                                           | No of cell lines | No of assays | Specific down-regulated target |
|------------|-------------------------------------------------------------------------------------|------------------|--------------|--------------------------------|
| Rapamycin  | 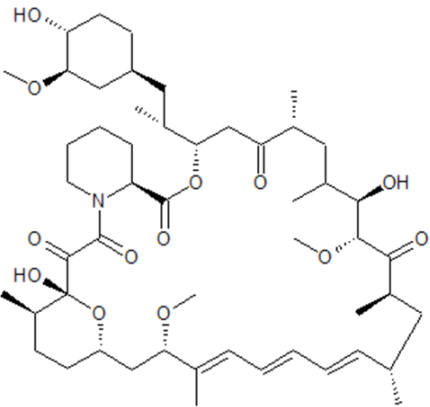   | 30               | 135          | mTORC1                         |
| Wortmannin |   | 14               | 131          | PI3K                           |
| AZD-8055   |  | 24               | 55           | mTORC1/mTORC2/Akt/PI3K         |
| LY294002   |  | 6                | 28           | PI3K                           |

To identify small molecule compounds that can inhibit REDD1 expression, we analyzed the transcriptional profiles induced by FDA-approved and experimental drugs from the LINCS library

(<http://lincsproject.org/LINCS/>) comprised of the results of ~1 million experiments in which the global effect of >20,000 unique compounds on human cell transcriptome was accessed across 50 cell types of varied lineage using custom-made DNA arrays. The molecular signature of each compound in each experiment is presented at LINCS as a list of DEGs - differentially expressed genes (compound-treated versus solvent-treated), ordered by descending expression fold-change. The top putative REDD1 inhibitors were selected according to the number of LINCS experiments in which REDD1 was within 100 most down-regulated genes in treated cells. For statistical computing, we used the R project version 3.2.5 (<https://www.r-project.org/>).

**Supplementary Table 2. Primer sets for Q-PCR analysis**

| Gene symbol  |               | Primer sequence: sense/antisense (5'-3')           |
|--------------|---------------|----------------------------------------------------|
| Mouse        | Human         |                                                    |
| <i>Rankl</i> |               | CAGCATCGCTCTGTTCTGTA<br>CTGCGTTTTTCATGGAGTCTCA     |
| <i>Opg</i>   |               | ACCCAGAAACTGGTCATCAGC<br>CTGCAATACACACACTCATCACT   |
| <i>Rpl27</i> |               | GCCCTGGTGGCTGGAATTGACC<br>TTGCGCTTCAAAGCTGGGTCCC   |
|              | <i>CCND1</i>  | CTACCTTCCGCAGTGCTCCTA<br>CCCAGCCAAGAAACGGTCC       |
|              | <i>CCND2</i>  | GCTGGAGCCCGTGAAAAAGA<br>CTCCGCCTCTGGCATTTTG        |
|              | <i>CD86</i>   | CTGCTCATCTATACACGGTTACC<br>GGAAACGTCGTACAGTTCTGTG  |
|              | <i>FKBP51</i> | GAATGGTGAGGAAACGCCGAT<br>TGCCAAGACTAAAGACAAATGGT   |
|              | <i>GILZ</i>   | AACACCGAAATGTATCAGACCC<br>TGTCACAGCTTAACGGAAACCA   |
|              | <i>IL7R</i>   | CGTCTATCGGGAAGGAGCCAAT<br>GCTGGATAAATTCACATGCGTCCA |
|              | <i>KLF9</i>   | GAAACACGCCTCCGAAAAGAGG<br>GAAAGGGCCGTTACCTGTATG    |
|              | <i>MKP1</i>   | ACCACCACCGTGTTCAACTTC<br>TGGGAGAGGTCGTAATGGGG      |
|              | <i>REDD1</i>  | TAGCCTTTGGGACCGCTTCTCGT<br>CAGGTAAGCCGTGTCTTCCTCCG |
|              | <i>RPL27</i>  | ACCGTACCCCCGCAAAGTG<br>CCCGTCGGGCCTTGCGTTTA        |

**Supplementary Table 3. Cytotoxicity of WM, LY294002, AZD8055 (IC<sub>50</sub> value after 24 h of incubation, uM)**

| <b>Compound</b> | <b>IC<sub>50</sub>, CEM, uM</b> | <b>IC<sub>50</sub>, Granta, uM</b> |
|-----------------|---------------------------------|------------------------------------|
| Wortmannin      | 9,145                           | 11,944                             |
| LY294002        | 61,969                          | 77,588                             |
| AZD8055         | 1,358                           | 2,015                              |

To calculate IC<sub>50</sub> values, CEM and Granta cells were pretreated with solvent, LY294002 (1-500 uM), WM (0,1-25 uM) and AZD8055 (0,05-5 uM) for 6 h and treated with either solvent or glucocorticoid Dex (1 uM) for 24 h. After the treatment, 20 ul of MTT solution (5 mg/ml) was added to each well and the plates were incubated for another 3 hours. After incubation with MTT, the medium was removed and 150 µL of 100% DMSO was added to each well. Optical density was read at 495 nm using a microplate reader MultiScan MCC 340 (Labsystems). Relative cell viability was determined respectively to the untreated cells. The IC<sub>50</sub> values was calculated using Quest Graph™ IC<sub>50</sub> Calculator software.
